# Supplementary material for: pH-Sensitive nanogates based on poly(l-histidine) for controlled drug release from mesoporous silica nanoparticles
Source: Royal Society of Chemistry journal article supplement (doi:10.1039/c5py01841b), 2016-01-01
Supplement: c5py01841b1.pdf [file c5py01841b1.pdf]

## Electronic Supplementary Information

### **pH-Sensitive Nanogates Based on Poly(L-Histidine) for Controlled Drug Release from Mesoporous Silica Nanoparticles**

Panayiotis Bilalis,<sup>1\*</sup> Leto-A. Tziveleka,<sup>2</sup> Spyridon Varlas,<sup>1</sup> Hermis Iatrou<sup>1\*</sup>

*1. University of Athens, Department of Chemistry, Panepistimiopolis, Zografou,  
15771, Athens, Greece*

*2. University of Athens, Department of Pharmacognosy and Chemistry of Natural  
Products, Faculty of Pharmacy, Panepistimiopolis, Zografou, 15771, Athens, Greece*

**\*Corresponding Authors:** pbilalis@chem.uoa.gr (P. Bilalis), iatrou@chem.uoa.gr (H. Iatrou); Tel.: +30-210-7274768; Fax: +30-210-7274186.

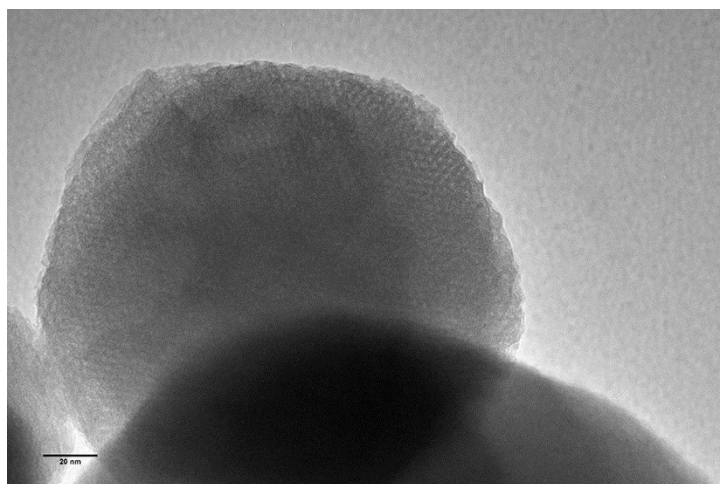

**Figure S1.** TEM image of MSN@PHis (the scale bar represents 20 nm).

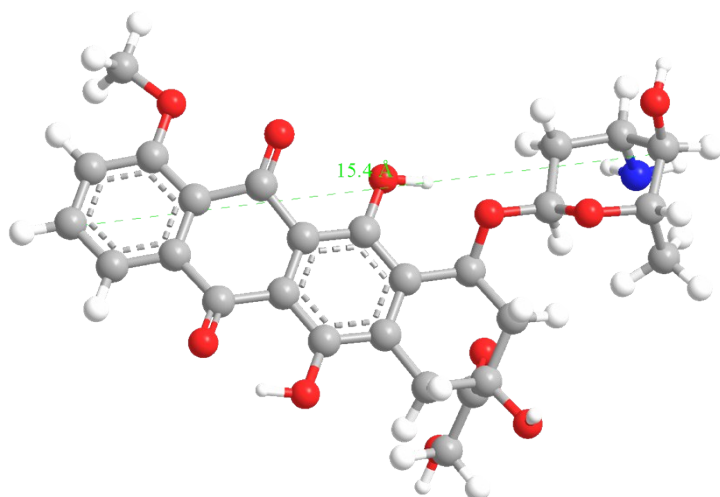

**Figure S2.** Molecular modeling of Doxorubicin (DOX) molecule (max diameter = 1.5 nm) employing ChemBio 3D Ultra (CambridgeSoft).

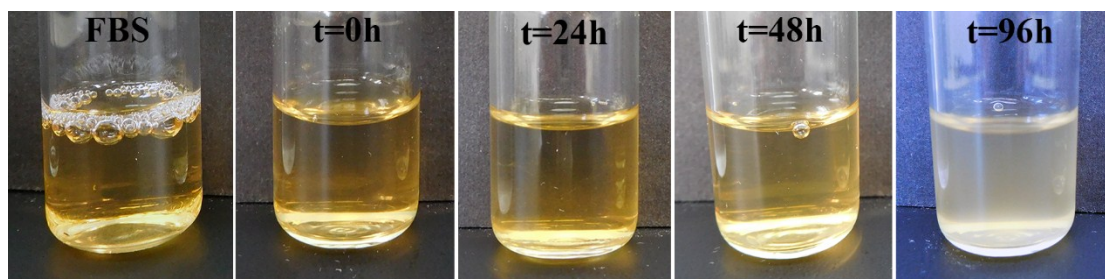

**Figure S3.** Stability test of MSN@PHis in FBS after t=0, 24, 48 and 96h of incubation at 37 °C.
